# Supplementary material
Source: publisher figshare collection journal article supplement (https://gsapubs.figshare.com/ndownloader/files/39537010)
Supplement: Supplementary file 1 [file 39537010]

## Sheet: Table S6
Table S6. Zircon trace element compositions (ppm) for the mineralized granitic rocks of porphyry molybdenum deposits in Central and NE China.
Sample No.	La	Ce	Pr	Nd	Sm	Eu	Gd	Tb	Dy	Ho	Er	Tm	Yb	Lu	T (°C)	Ce4+/Ce3+	Eu/Eu*	ΔFMQ
TGP20-004 Taoguanping mineralized monzogranite
TGP20-004-03	0.00797677	24.7099	0.118718	2.32088	4.32182	2.35257	22.4101	7.41082	98.5843	40.8274	209.973	49.9684	590.439	116.033	668.438	61.0354	0.751551	1.48496
TGP20-004-04	0.0539728	24.5433	0.419478	6.28441	8.70725	2.0641	36.9794	11.0633	123.592	42.5301	186.808	38.2041	387.509	66.0591	809.9	10.9742	0.361645	0.845596
TGP20-004-06	0.0035444	25.7119	0.0261986	0.563881	1.55627	0.680664	9.81494	3.59434	50.0525	21.3061	115.887	28.3215	347.847	68.9855	667.14	308.242	0.547541	0.981046
TGP20-004-07	0.612672	26.4374	0.194311	1.17897	1.56798	0.712591	8.92248	3.47761	45.4419	19.0522	101.328	24.4361	301.137	58.6492	659.733	165.098	0.598961	1.2189
TGP20-004-11	0.0544465	48.9171	0.15824	2.32844	4.63535	2.36772	24.8617	8.33265	111.626	46.3	241.601	56.2217	662.02	130.678	695.942	121.864	0.693417	2.32828
TGP20-004-18	0.0165086	78.9541	0.0963925	2.31536	8.64808	4.39484	61.2947	21.1586	254.088	90.6437	393.745	78.3404	783.694	129.771	732.909	105.96	0.600126	1.16021
TGP20-004-19	0.00594477	22.8976	0.0252655	0.470163	1.27811	0.689691	8.70038	3.42079	50.342	23.4292	138.203	36.2077	469.192	102.229	663.248	458.537	0.650238	0.905864
TGP20-004-21	0.00232869	28.0348	0.0621577	1.18173	2.99656	1.45801	18.4999	5.96831	72.0458	27.8133	141.69	33.5958	421.285	90.7997	666.857	122.281	0.615654	0.664105
TGP20-004-23	0.00473528	22.8231	0.0322636	0.484899	1.16783	0.631658	8.86264	3.53942	51.3644	22.5654	124.828	31.2815	392.321	81.0019	652.044	401.378	0.61728	1.23389
TGP20-004-25	0.169321	57.2941	0.183509	1.57233	3.84682	1.35043	26.2211	10.1792	142.067	63.5977	362.506	91.2038	1145.69	229.82	709.082	297.46	0.422732	0.0298981
TGP20-004-27	0.0229586	78.0408	0.0940693	2.47795	10.435	4.87247	69.8607	24.4574	294.438	104.595	455.854	89.656	898.86	147.121	723.328	93.5268	0.567359	0.909543
TGP20-004-30	0.122398	73.0311	0.112949	2.22207	8.59099	4.23901	59.3939	21.7786	270.979	98.7637	442.728	89.8846	920.555	154.945	746.358	114.446	0.589987	1.17618
Average															699.582	188.4	0.584708	1.07821
LM0101 Luming mineralized monzogranite
LM0101-1	0	12.7	0.03	1.08	2.3	0.49	13.8	4.66	58.6	21.2	106	23	245	45.6	831.845	75.1926	0.265899	0.5147
LM0101-2	0.92	23.6	0.29	2.19	2.37	0.53	13.6	4.81	62.6	25	124	27.3	295	55.4	722.267	88.1797	0.285401	0.591701
LM0101-3	0.03	11.5	0.09	1.03	2.53	0.52	15.9	4.81	64.3	25.7	125	26.2	288	54.8	802.438	73.7647	0.25065	0.179697
LM0101-4	0.17	15.7911	0.09	1.26	2.33	0.39	11.6	4.51	61.9	24.6	120	25.7	288	52.9	737.394	96.9714	0.229341	-0.190272
LM0101-5	0.59	23.7	0.23	1.95	2.76	0.37	17.5	5.75	76.5	29.5	147	31.7	352	61.1	767.811	91.4204	0.162762	1.1051
LM0101-6	0	13.5	0.14	1.17	5.33	0.84	26.6	8.61	102	35.3	166	33.2	345	60.2	781.383	47.2483	0.215674	-0.0414703
LM0101-7	0.47	17.1	0.17	1.81	3	0.56	17	5.54	68.7	26	127	27	281	51.5	787.222	58.6797	0.239732	0.125075
LM0101-8	0	11.8	0.03	0.79	1.92	0.35	11.9	4.01	49.1	19	87.4	18.7	197	37.1	820.548	90.717	0.223855	-0.276349
LM0101-9	0.24	19.4	0.1	1.55	2.95	0.46	15.9	6.13	74.2	28.4	141	30.3	325	60.9	762.231	86.3622	0.205339	0.589001
LM0101-10	0	12.4723	0.05	0.85	2.04	0.31	10.7	3.61	46.5	18.3	89.1	19.6	218	39.9	784.337	96.5642	0.202852	-1.22964
LM0101-11	0	10.9	0.07	1.13	2.39	0.54	14.5	4.56	57.5	21.7	104	22	244	44.5	839.107	58.9434	0.280436	-0.624664
LM0101-12	1.34	25.9	0.45	2.92	3.16	0.57	20.1	6.92	82.6	31.4	152	31.9	337	59.5	740.245	60.7285	0.218654	0.972863
LM0101-13	0.24	9.78	0.06	0.96	1.65	0.71	9.06	2.8	37.3	15.2	82.8	20.4	259	56.2	799.016	95.7073	0.561405	-0.974862
LM0101-14	0.01	15.3	0.14	2.96	5.34	0.87	24.7	8.78	105	39.2	183	39.3	411	73.5	799.016	28.3095	0.231592	0.435923
Average															783.919	74.9135	0.255257	0.0840576
CHG12-12 Chehugou mineralized granite porphyry
CHG12-12-03	0.77	33.7	1.6	13	8.28	0.82	17.2	4.48	40.5	13.1	59.4	14.2	160	34.3	670.839	11.7095	0.210067	-1.49332
CHG12-12-04	0.23	126.9	0.46	8.41	17.6	1.78	79.6	21.9	215	69.6	263	50.2	425	72.1	698.274	54.0509	0.145389	0.5976
CHG12-12-06	2.19	37.2	2.23	16.7	9.11	0.82	19.1	5.35	51.5	18	85	20.8	231	48.4	693.394	12.748	0.190047	-1.53544
CHG12-12-07	1.18	74.6	1.34	12.3	10.2	1.05	33.4	8.64	81.4	26.1	104	22	208	39.4	683.113	24.3776	0.173916	-0.183967
CHG12-12-09	0.2	28.6	0.47	3.05	2.25	0.23	8.03	2.42	28.6	12	63.4	17.7	215	46.4	639.496	123.09	0.165425	-1.67815
CHG12-12-10	0.22	28.4	0.12	1.63	2.68	0.28	11.8	3.49	39	14.7	67.1	16.6	178	35.2	674.317	141.11	0.152221	-1.27723
CHG12-12-12	0.58	39.2	0.37	4.41	4.26	0.45	13.9	3.85	40.6	15.2	69	16.4	172	34.7	753.776	60.4901	0.178782	-0.99363
CHG12-12-13	0.69	35.3	2	14.9	7.06	0.65	12.4	3.45	34.5	13.2	66.6	18.1	218	48.9	615.112	17.7076	0.212385	-1.42402
CHG12-12-14	0.11	22.6	0.13	1.52	2.7	0.06	15.6	5.47	63.5	24.2	105	22.9	217	38.3	635.209	122.885	0.0282638	-1.42789
CHG12-12-16	0.08	34	0.12	1.81	3.03	0.33	14	4.18	45	17.2	79.7	19.3	206	41.3	630.284	152.492	0.1549	-1.15562
CHG12-12-17	0.05	43.5	0.3	4.38	6.89	0.7	24.9	6.7	67.1	22.9	96.9	21.4	208	39	732.827	47.724	0.163385	-0.422316
CHG12-12-18	2.67	21.9	0.58	2.88	1.34	0.14	5.78	1.86	22.6	9.11	45.4	11.6	131	26.3	695.544	100.336	0.153793	-1.4872
CHG12-12-19	0.39	35.1	1.13	8.78	6	0.63	15.3	4.12	40.7	14.1	63.1	14.9	157	31	677.167	21.6748	0.201022	-1.35692
CHG12-12-20	0.06	16.8	0.23	3.05	4.28	0.1	16.8	5.01	54	19.1	80	17.2	161	27.2	794.608	29.8512	0.0360535	-2.08489
CHG12-12-21	0.15	15	0.23	2.45	2.46	0.26	8.34	2.38	23.7	9.18	44.9	11.5	127	25.9	619.997	48.2984	0.175488	-1.75562
CHG12-12-23	0.22	13.9	0.08	0.82	1.09	0.14	4.36	1.38	15.3	6.12	29.6	7.6	87.6	18.4	594.073	169.693	0.196334	-1.75795
CHG12-12-24	0.12	35	0.1	1.34	2.84	0.33	14	4.36	46.4	17.4	76.8	17.6	181	36.7	678.183	191.444	0.159998	-0.978095
CHG12-12-25	0.22	41.5	0.44	3.88	2.9	0.29	8.93	2.69	30	12.4	64.6	17.2	199	44.6	705.865	117.787	0.17422	-1.68509
CHG12-12-27	0.22	35.9	0.49	4.13	3.22	0.3	9.67	2.91	30	11.5	54.2	13.3	142	28.6	637.96	66.7589	0.164363	-1.37687
CHG12-12-28	0.08	27.4	0.23	2.43	2.99	0.36	11	3.18	36	14.3	72.5	17.6	194	45.1	662.894	105.801	0.191908	-1.56435
Average															674.647	81.0014	0.161398	-1.25205
JSH1-3 Xinhualong mineralized granodiorite porphyry
JSH1-3-01	0.89	8.99048	0.38	2.69524	2.53333	0.197143	11.819	4.05714	45.7429	16.9238	73.7333	15.1714	147.733	27.9905	726.273	29.6985	0.110146	-1.6504
JSH1-3-02	<0.02	2.7619	0.04	0.859048	1.98095	0.197143	9.4381	3.10476	34.7429	12.6	54.019	11.0286	108.229	20.219	774.105	23.184	0.139388	-3.53129
JSH1-3-03	<0.02	5.11429	0.08	1.52381	2.88571	0.314286	15.1429	5.18095	60.4952	23.181	103.724	22.1333	219.99	42.2095	751.354	31.5261	0.145351	-2.58048
JSH1-3-04	<0.02	6.3619	0.1	1.77143	3.88571	0.172381	18.0286	5.98095	68.0095	25.0952	109.333	22.5238	216.619	40.619	744.457	27.1781	0.0629647	-1.93959
JSH1-3-05	<0.03	2.67619	0.03	0.52381	1.19048	0.10381	6.26667	2.06667	24.419	8.74286	37.5143	7.89524	77.2286	14.5619	790.572	41.3126	0.116194	-3.95266
JSH1-3-06	0.07	3.8	0.18	3.4	5.94286	0.724762	25.8	8.04762	81.3048	27.2476	106.733	20.9619	192.076	34.8857	736.427	5.11628	0.178942	-3.02258
JSH1-3-07	0.1	31.4762	1.06	20.3333	35.819	2.58095	143.067	41.8857	407.048	127.438	483.067	88	768.848	132.562	713.733	5.40785	0.110224	0.815035
JSH1-3-08	0.77	7.00952	0.36	2.35238	2.44762	0.294286	11.1524	3.77143	41.7048	15.3143	66.0476	13.6667	132.667	24.9143	747.139	24.7066	0.172202	-1.89804
JSH1-3-09	0.45	10.8095	0.42	4.86667	8.18095	0.705619	33.3048	10.1048	108.486	37.381	152.676	30.4095	282.61	51.6095	722.88	12.305	0.130689	-1.63369
JSH1-3-10	0.04	4.26667	0.17	2.70476	4.42857	0.409524	20.3048	6.20952	67.8095	23.3714	97.0571	19.3905	186.305	34.8952	785.352	9.50168	0.13203	-2.83556
JSH1-3-11	<0.02	3.34286	0.06	1.1619	2.3619	0.112381	10.9905	3.82857	41.4762	15.0095	65.0952	13.5619	134.571	25.7905	776.891	21.8874	0.0674337	-3.33956
JSH1-3-12	0.07	5.34286	0.34	5.4381	10.2	1.25714	40.819	12.3333	125.6	42.0571	167.676	32.4095	301.438	54.619	816.092	4.13464	0.188355	-2.68225
JSH1-3-13	0.02	3.30476	0.18	2.89524	5.61905	1.01905	22.8571	7.14286	74.1905	25.2952	102.619	20.1048	187.638	34.0571	769.595	5.4586	0.274901	-3.55231
JSH1-3-14	<0.01	2.50476	0.04	0.857143	1.24762	0.141905	5.4381	1.77143	21.3238	8.30476	39.981	9.51429	105.095	22.8571	791.276	33.6554	0.166554	-3.95224
JSH1-3-15	<0.01	4.05714	0.04	0.854286	2.35238	0.187619	11.1048	3.81905	43.4952	15.781	68.3905	14.3143	140.314	26.419	719.378	36.2094	0.112226	-2.85597
JSH1-3-16	<0.03	2.26667	0.05	1.06667	2.24762	0.166667	8.92381	2.86667	31.7143	10.981	47.5429	9.41905	90.5238	17.3905	818.748	13.001	0.113772	-3.8798
JSH1-3-17	0.04	14.7048	0.14	3.20952	7.46667	0.275238	28.6571	9.15238	96.1333	32.8476	133.59	26.4286	244.829	43.8	672.943	24.3597	0.0575244	-0.9939
JSH1-3-18	<0.05	3.65714	0.25	4.01905	6.73333	0.4	27.7048	8.38095	88.019	29.0476	116.324	22.3048	204.648	37.1048	767.7	3.91082	0.0895347	-3.16181
JSH1-3-19	0.03	2.05714	0.06	0.914286	1.62857	0.168571	8.3619	2.64762	29.9048	10.4857	44.4381	9.00952	87.8381	16.4667	767.168	16.0036	0.139653	-4.34989
JSH1-3-20	0.03	3.77143	0.14	2.55238	4.75238	0.460952	21.1333	6.69524	72.2095	24.8095	101.933	20.5143	194.133	35.1905	778.746	8.43916	0.140618	-3.13582
Average															758.542	18.8498	0.132435	-2.70664
Note: The sample TGP20-004 is from Zheng et al. (2022) and other samples (e.g., LM0101, CHG12-12, and JSH1-3) are from Shu et al. (2019 and references therein). Zircon trace element compositions of these samples are used to calculate the T, Ce4+/Ce3+, Eu/Eu*, and ΔFMQ by the same formulas with the Mangling intrusive complex for comparison. The assumed water content is 6.5 wt% due to their mineral…
References:
Shu, Q.H., Chang, Z.S., Lai, Y., Hu, X.L., Wu, H.Y., Zhang, Y., Wang, P., Zhai, D.G., and Zhang, C., 2019, Zircon trace elements and magma fertility: insights from porphyry (-skarn) Mo deposits in NE China: Mineralium Deposita, v. 54, p. 645–656, https://doi.org/10.1007/s00126-019-00867-7.
Zheng, X.T., Zhao, L.D., Wang, M., Jiao, J.G., Zhou, B., Jia, L., and Fan, P., 2022, Geochronology, geochemistry and magmatic properties of small plutons for the Taoguanping and Huoliaogou, Northern Qinling: Geochimica, https://doi.org/10.19700/j.0379-1726.2022.03.012. [in Chinese with English abstract], (in press).
